# Supplementary material for: Solution-grown ternary quasi-cube AgSbTe2 and its optoelectronic performance for broadband photodetection
Source: Royal Society of Chemistry journal article supplement (doi:10.1039/d3ce00026e), 2023-01-01
Supplement: d3ce00026e1.pdf [file d3ce00026e1.pdf]

## Supporting Information

### Solution-grown ternary quasi-cube $\text{AgSbTe}_2$ and their optoelectronic performance for broadband photodetection

Cunxin Li,<sup>‡a</sup> Kaijia Xu,<sup>‡a</sup> Lanjun Cheng,<sup>b</sup> Zhichuan Wu,<sup>\*a</sup> and Yinyin Qian<sup>\*a</sup>

<sup>a</sup>Anhui Laboratory of Clean Energy Materials and Chemistry for Sustainable Conversion of Natural Resources, College of Chemical and Environmental Engineering, Anhui Polytechnic University, Wuhu, 241000, China

<sup>b</sup>School of Chemistry and Chemical Engineering, Hefei University of Technology, Hefei, 230009, China

<sup>‡</sup>These authors contributed equally to this work.

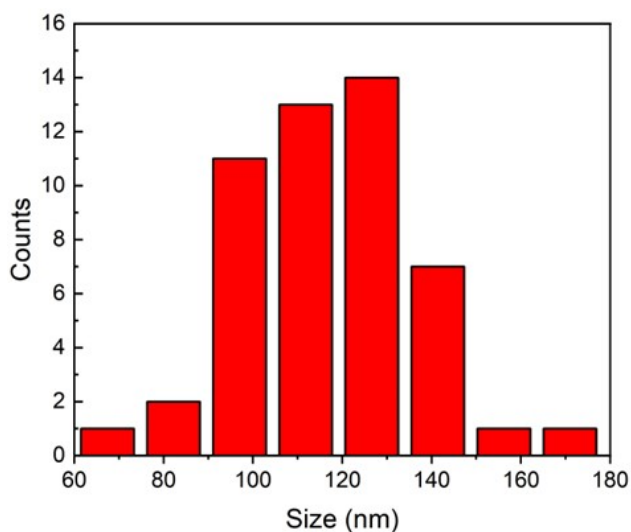

**Figure S1.** The size-distribution histograms of  $\text{AgSbTe}_2$  nanocrystals.

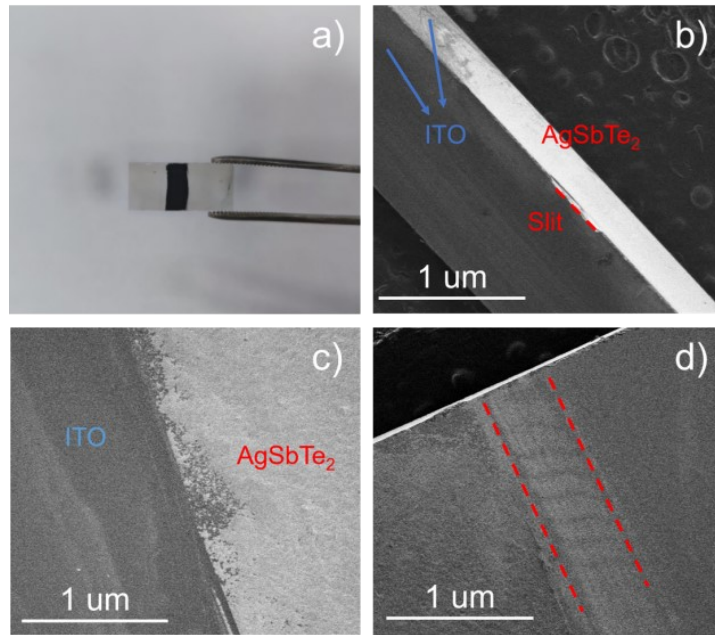

**Figure S2.** (a) The real photo of photodetector and (b-d) SEM images of photodetector.

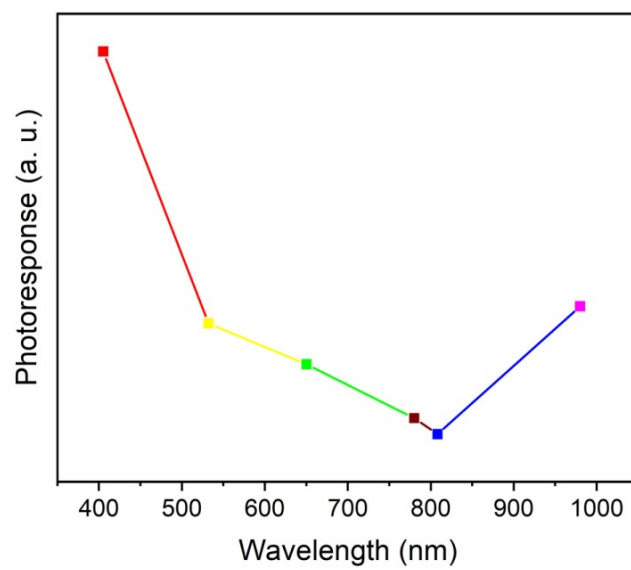

**Figure S3.** The wavelength dependent photoresponse using varied wavelengths from 405 to 980 nm.

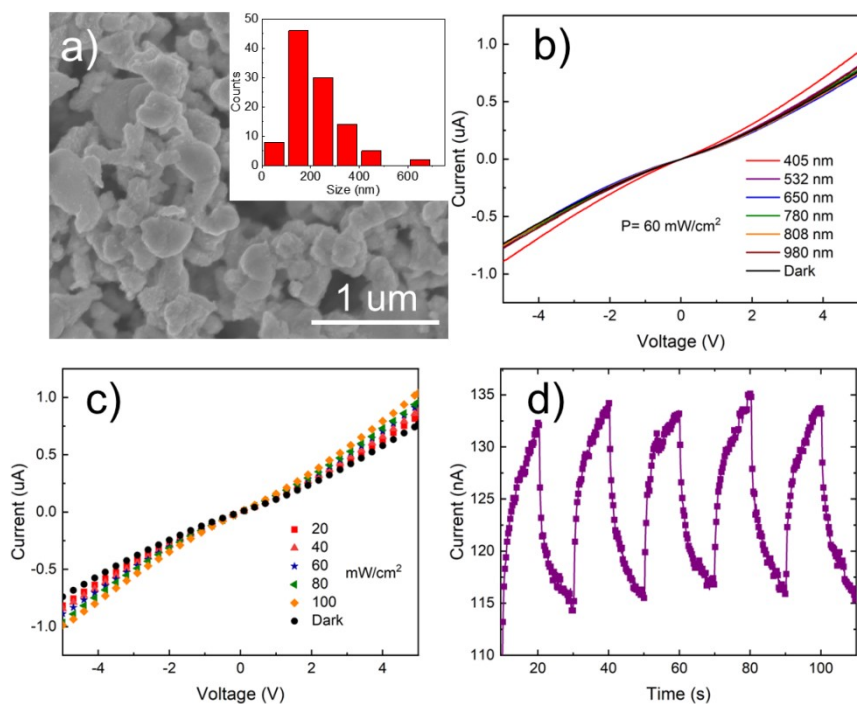

**Figure S4.** (a) The size-distribution histograms of AgSbTe<sub>2</sub> nanocrystals reacted at 210 °C for 30 min. (b) I-V curves in the dark and under different wavelengths of light sources with a constant light illumination power. (c) I-V curves under 405 nm irradiation with varied light illumination power from 20 to 100 mW/cm<sup>2</sup>. (d) Temporal photoresponse of the device at bias voltage of 1 V.

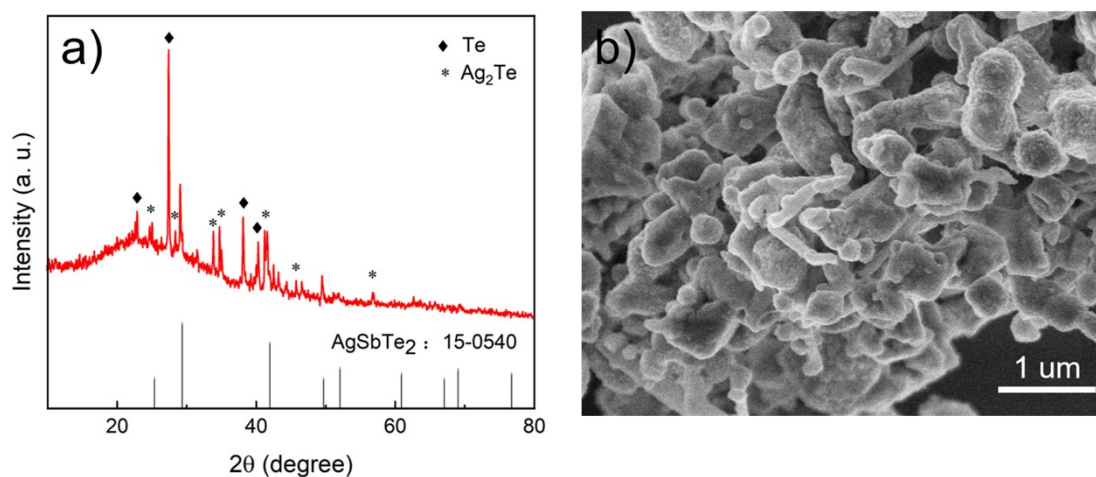

**Figure S5.** a) XRD patterns of AgSbTe<sub>2</sub> nanocrystals obtained in 1-octadecene. b) SEM of AgSbTe<sub>2</sub> nanocrystals obtained in 1-octadecene.

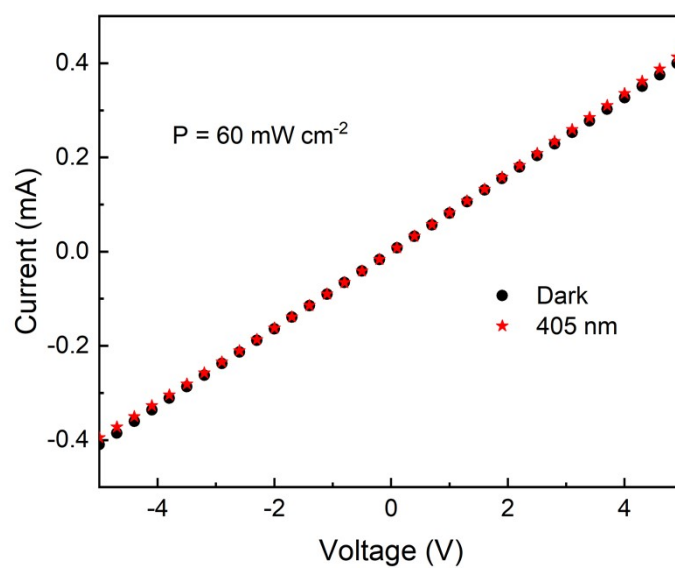

**Figure S6.** I - V plots photodetectors measured of AgSbTe<sub>2</sub> nanocrystals obtained in 1-octadecene in the dark and under 405 nm illumination.

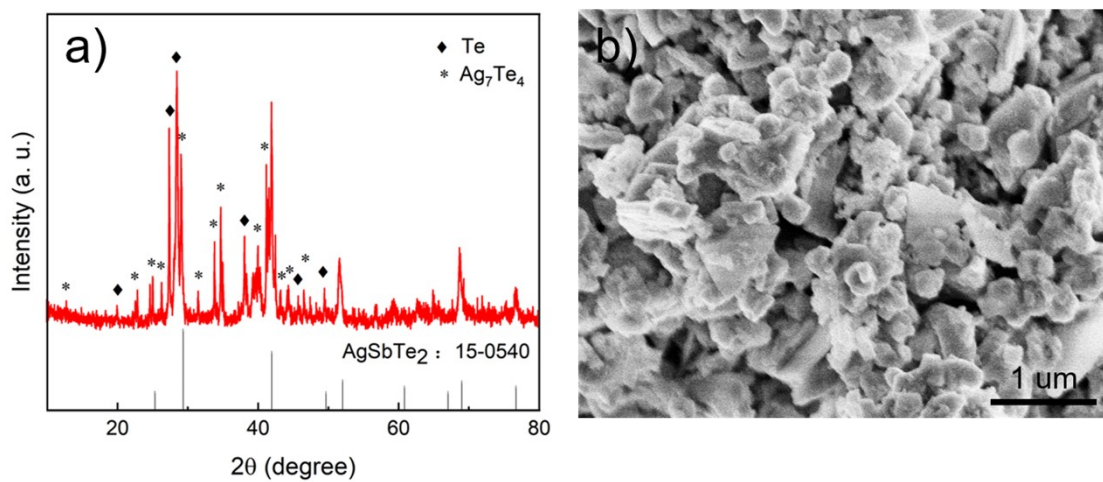

**Figure S7.** a) XRD patterns of AgSbTe<sub>2</sub> nanocrystals obtained at 240 °C for 30 min. b) SEM of AgSbTe<sub>2</sub> nanocrystals obtained at 240 °C for 30 min.

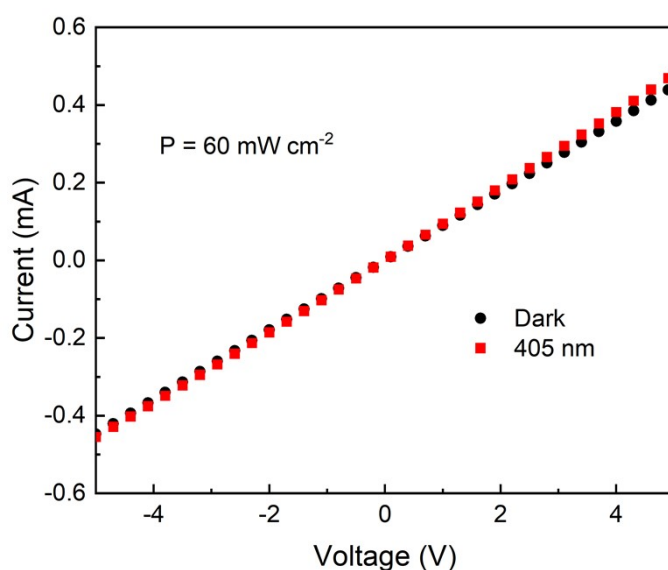

**Figure S8.** I - V plots photodetectors measured of AgSbTe<sub>2</sub> nanocrystals obtained at 240 °C for 30 min in the dark and under 405 nm illumination.

**Table S1.** Comparison of the photoelectric performance parameters for the present AgSbTe<sub>2</sub> nanocrystals with other recent reported colloidal nanocrystals-based solution-processed photodetectors.

| structures                        | Wavelengths (nm) | Power density (mW/cm <sup>2</sup> ) | Responsivity (mA/W) | Rise/fall time (s) | Detectivity (Jones)  | Refs.                                                     |
|-----------------------------------|------------------|-------------------------------------|---------------------|--------------------|----------------------|-----------------------------------------------------------|
| AgSbTe <sub>2</sub>               | 405-980          | 5                                   | 2.44                | 0.49/0.58          | $2.0 \times 10^9$    | This work                                                 |
| SnSe <sub>2</sub>                 | 405-1064         | 150                                 | 6.7                 | 3.7/3.1            | —                    | <i>CrystEngComm</i> , <b>2021</b> , 23,2034               |
| NiTe <sub>2</sub>                 | 650-1550         | 11.2                                | 18.45               | 0.31/0.21          | $8.3 \times 10^8$    | <i>ACS Appl. Nano Mater.</i> , <b>2022</b> , 5, 6094–6099 |
| AgBiS <sub>2</sub>                | 350-1070         | —                                   | 375                 | —                  | $3.0 \times 10^{11}$ | <i>Nanoscale</i> , <b>2022</b> , 14, 4987                 |
| Cu <sub>3</sub> NbSe <sub>4</sub> | 400              | 20                                  | —                   | 0.3/0.1            | —                    | <i>DaltonTrans.</i> , <b>2022</b> , 51,16937              |
